# Supplementary material for: RNAP II CTD tyrosine 1 performs diverse functions in vertebrate cells
Source: eLife journal article supplement (doi:10.7554/elife.02112), 2014-05-08
Supplement: supp [file elife-02112-supp-v1.zip]

| <b>Cell type</b> | <b>Total No. of reads mapped to polyA sites (million)</b> |
|------------------|-----------------------------------------------------------|
| 26r              | 5.3                                                       |
| S2A              | 5.5                                                       |
| S5A              | 4.8                                                       |
| 25F+Y            | 4.2                                                       |
| T4V              | 4.5                                                       |
