# Supplementary material for: RNAP II CTD tyrosine 1 performs diverse functions in vertebrate cells
Source: eLife journal article supplement (doi:10.7554/elife.02112), 2014-05-08

A

| CTD mutant    | Cell viability<br>(complementation test) |
|---------------|------------------------------------------|
| 26r (YSPTSPS) | Viable                                   |
| Y1F (FSPTSPS) | Inviabile                                |
| 20F + 6Y      | Inviabile                                |

B

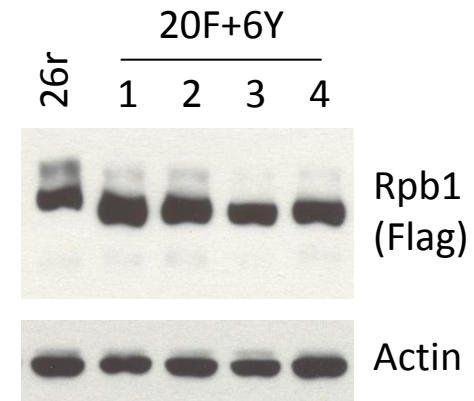

C

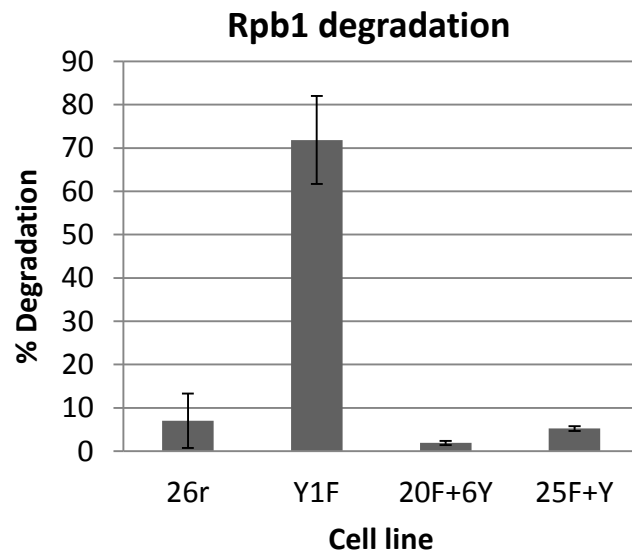

Supplement: supp [file elife-02112-supp-v1.zip]
