# Supplementary figures and images for: RNAP II CTD tyrosine 1 performs diverse functions in vertebrate cells
Source: eLife journal article supplement (doi:10.7554/elife.02112), 2014-05-08

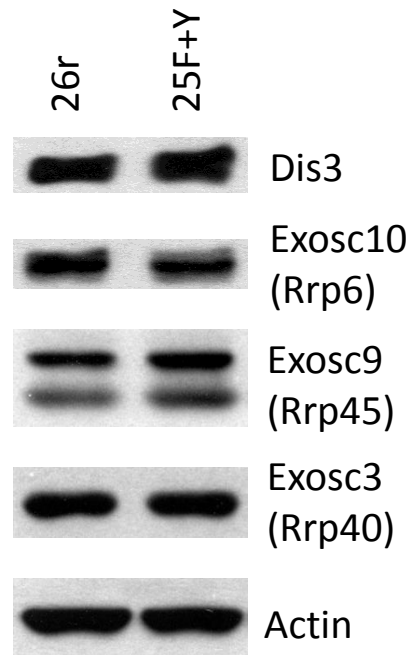

Supplement: supp [file elife-02112-supp-v1.zip]

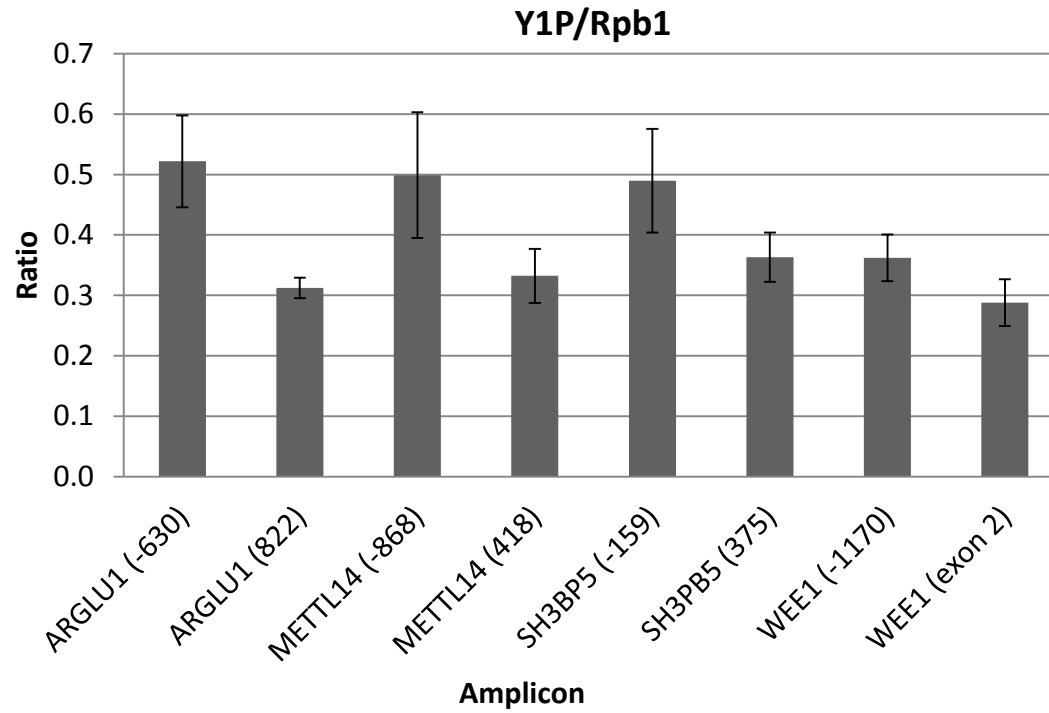

Supplement: supp [file elife-02112-supp-v1.zip]

Figure 2-figure supplement 1

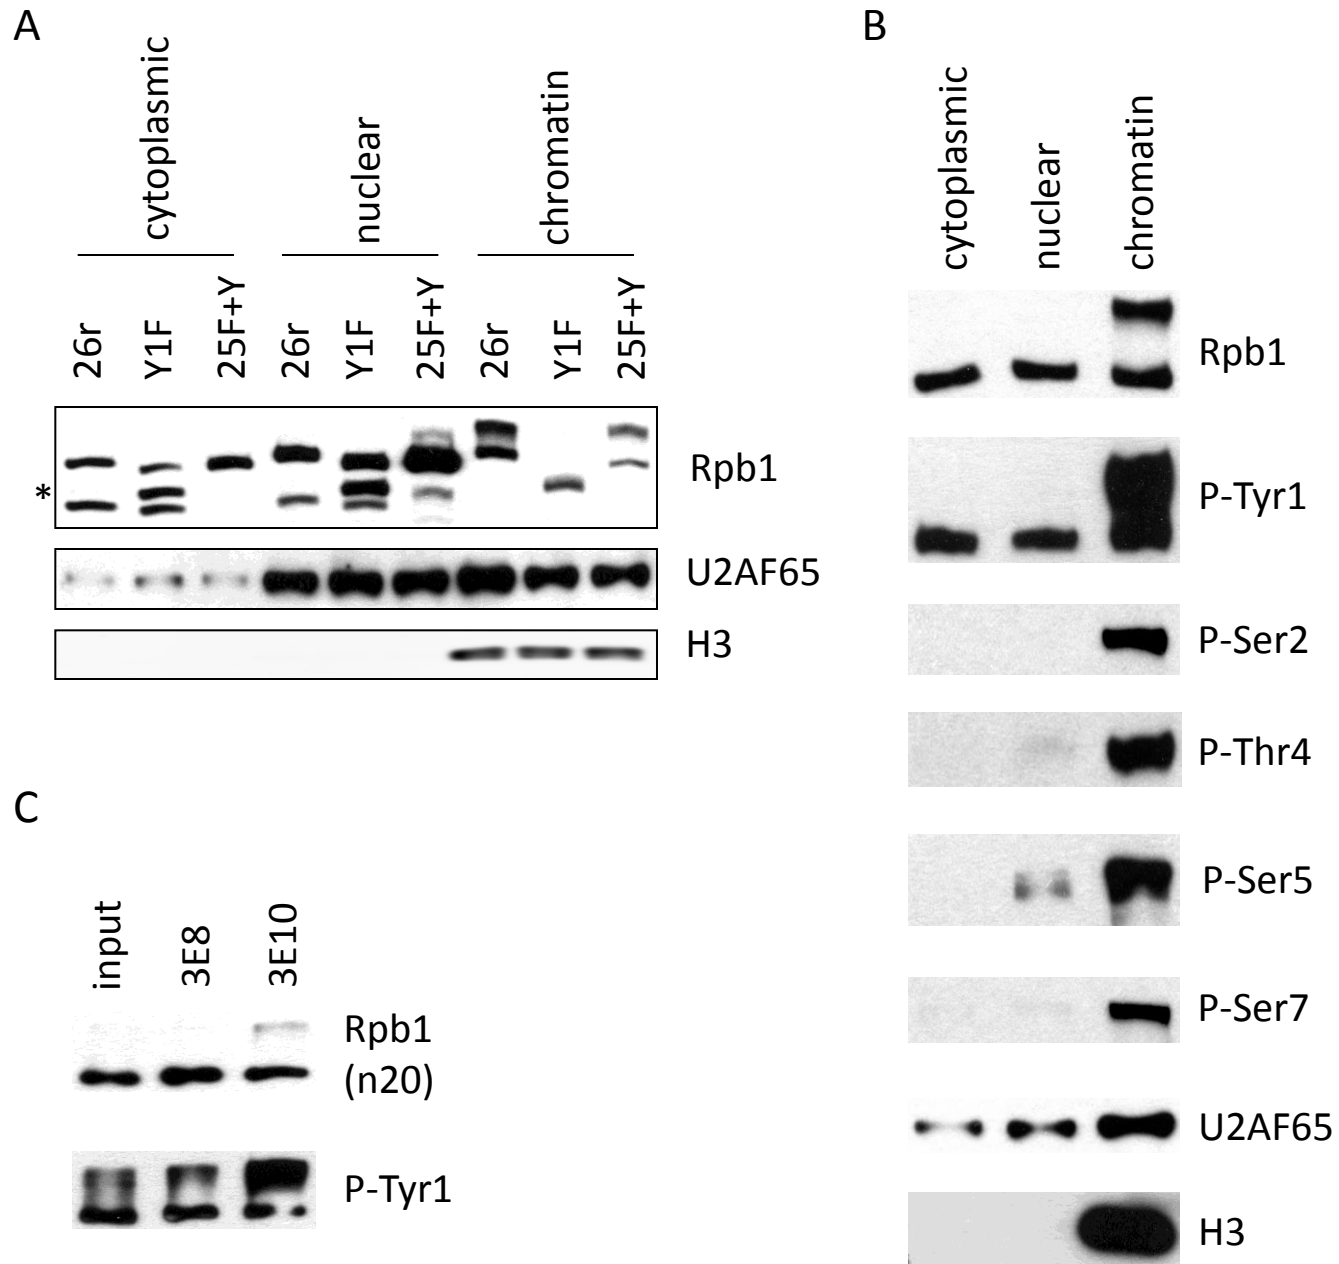

Supplement: supp [file elife-02112-supp-v1.zip]

A

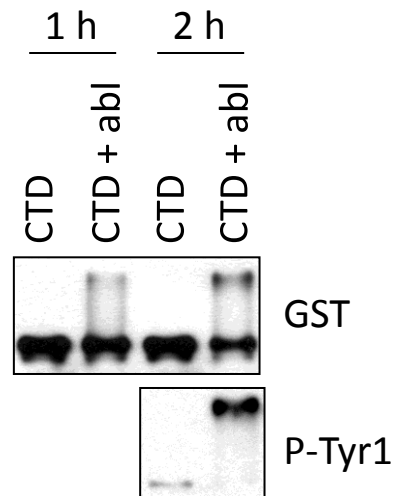

B

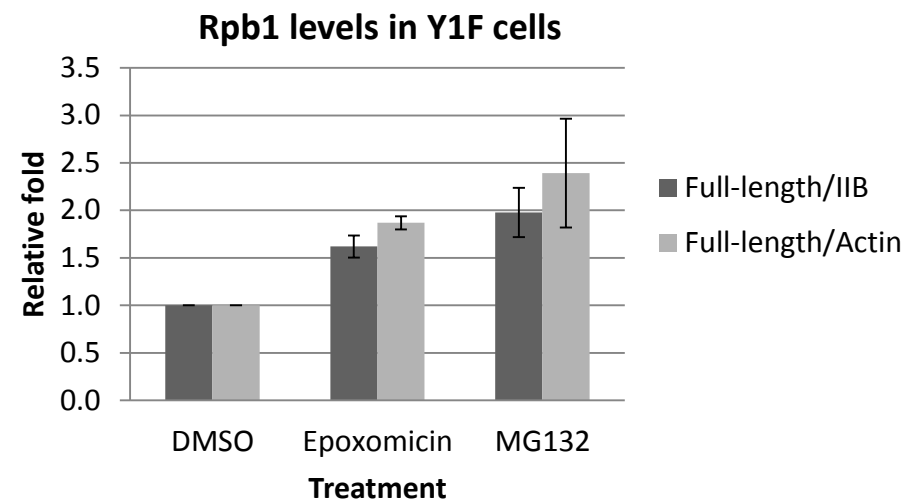

Supplement: supp [file elife-02112-supp-v1.zip]

A

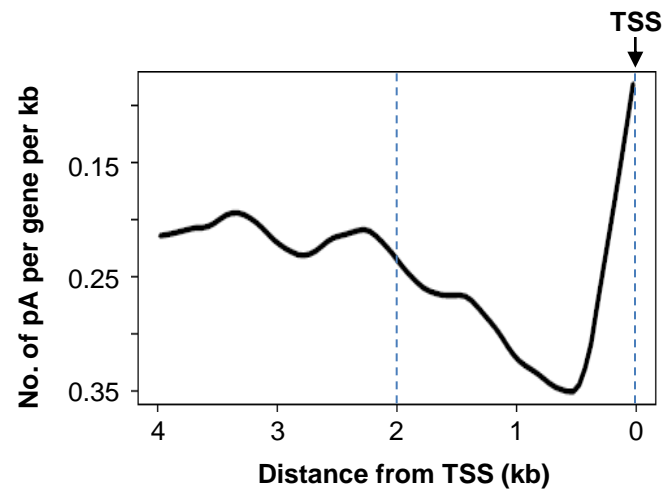

B

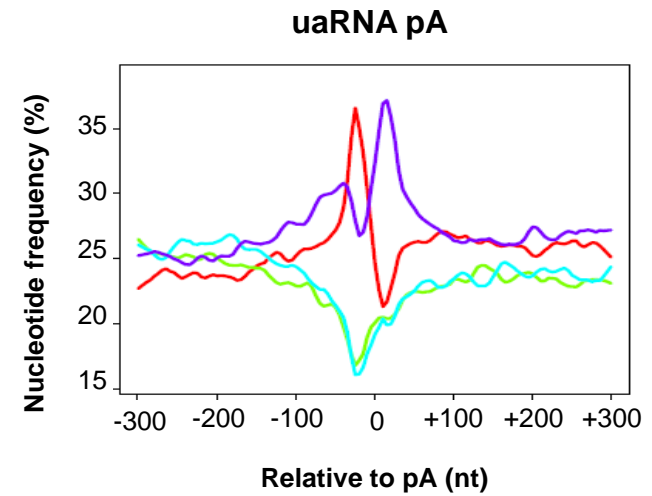

Supplement: supp [file elife-02112-supp-v1.zip]

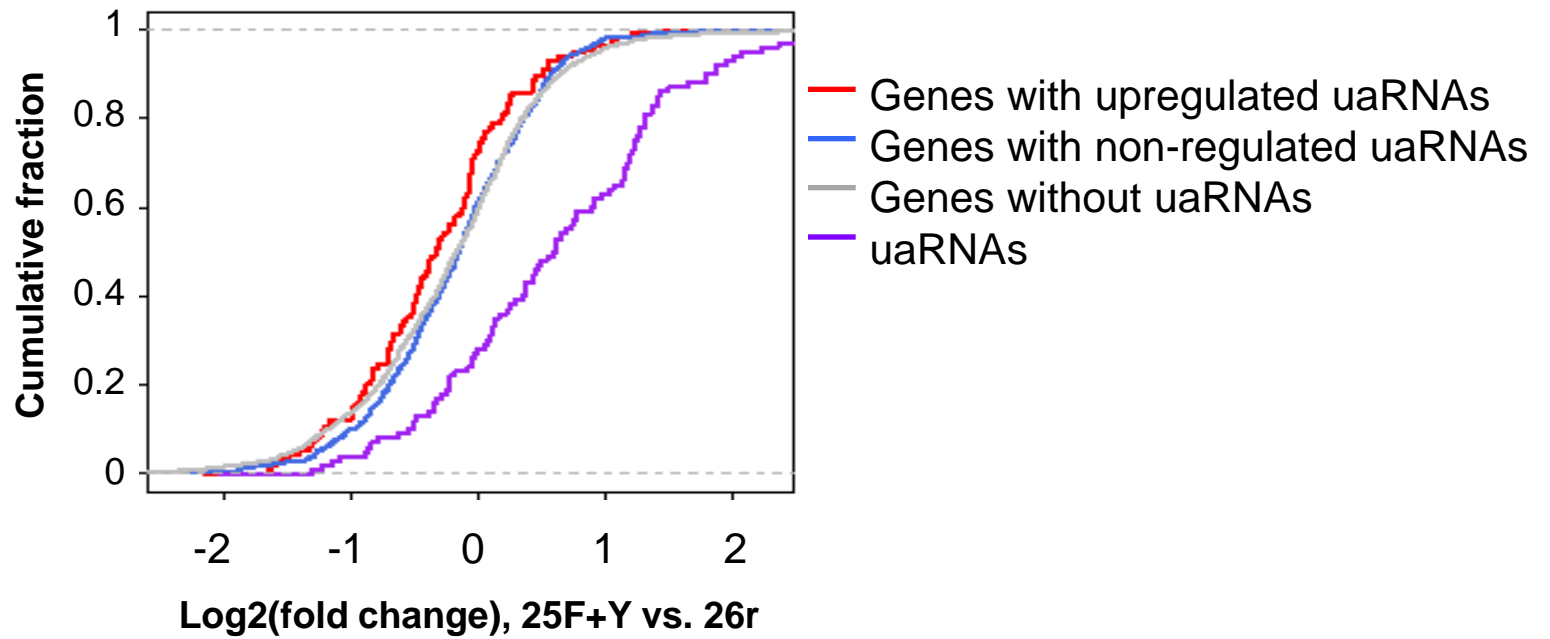

Supplement: supp [file elife-02112-supp-v1.zip]

A

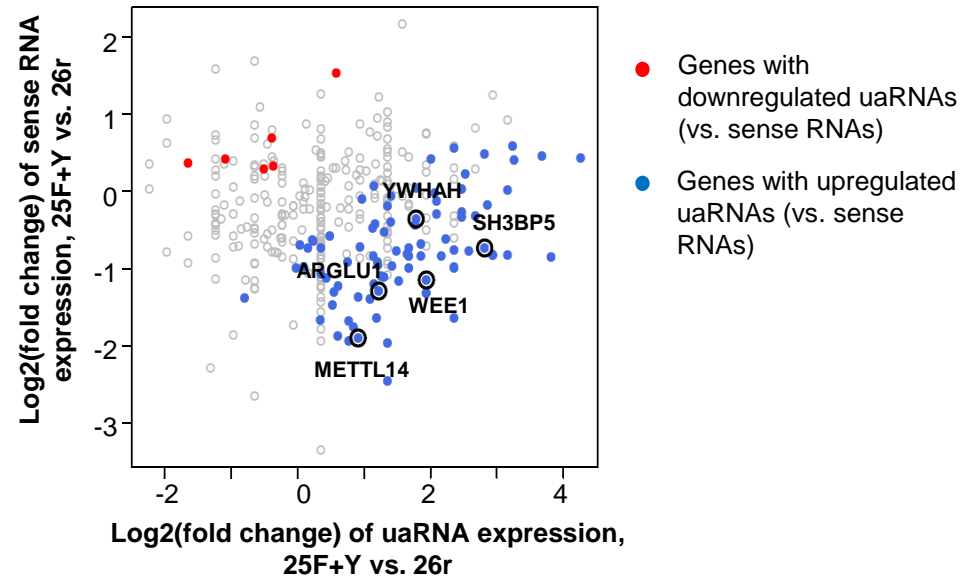

B

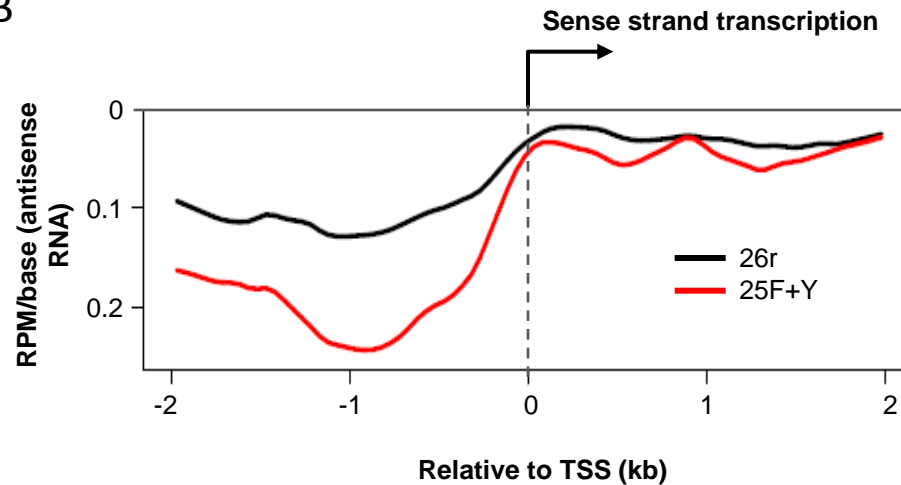

Supplement: supp [file elife-02112-supp-v1.zip]
